# Supplementary material for: Staurosporine Induces Necroptotic Cell Death under Caspase-Compromised Conditions in U937 Cells
Source: PubMed Central journal article supplement (PMC3409216; doi:10.1371/journal.pone.0041945), 2012-07-31
Supplement: pone.0041945.s006.pdf [file pone.0041945.s006.pdf]

## **Supporting information Text**

### **Text S1**

The inhibitory effect of GA was more potent than that of Nec during STS-evoked necroptosis; however, the difference was not significant. This might be the consequence of the inhibition of HSP90 and degradation or loss of function of various other proteins than RIPK1. E.g. the autophagoc protein Beclin-1 was shown to form complex with HSP90 [1]. Parallel processes of necroptosis and autophagy might be inhibited by GA while Nec arrests only the former one.

### **Reference**

1. Xu C, Liu J, Hsu L, Luo Y, Xiang R, et al. (2011) Functional interaction of Hsp90 and Beclin 1 modulates Toll-like receptor-mediated autophagy. *FASEB Journal* 25: 2700-2710.
