# Supplementary material for: Staurosporine Induces Necroptotic Cell Death under Caspase-Compromised Conditions in U937 Cells
Source: PubMed Central journal article supplement (PMC3409216; doi:10.1371/journal.pone.0041945), 2012-07-31
Supplement: pone.0041945.s007.pdf [file pone.0041945.s007.pdf]

## Supporting information Text

### Text S2

Degterev *et al.* have shown that autophagy is a common downstream consequence of necroptosis and acts as a repair and energy production process, but inhibition of autophagy has no effect on necroptosis [1]. On the contrary, Bonapace *et al.* reported that inhibition of autophagy blocked the necroptotic process [2]. Autophagy may play role parallel or sequential to necroptosis after treatments with STS and zVD, as 3-methyladenine partially (like Nec) inhibited the PI staining in U937 cells (Dunai *et al.*, unpublished result).

### References

1. Degterev A, Huang Z, Boyce M, Li Y, Jagtap P, et al. (2005) Chemical inhibitor of nonapoptotic cell death with therapeutic potential for ischemic brain injury. *Nature chemical biology* 1: 112-119.
2. Bonapace L, Bornhauser BC, Schmitz M, Cario G, Ziegler U, et al. (2010) Induction of autophagy-dependent necroptosis is required for childhood acute lymphoblastic leukemia cells to overcome glucocorticoid resistance. *Journal of Clinical Investigation* 120: 1310-1323.
