# Supplementary material for: Staurosporine Induces Necroptotic Cell Death under Caspase-Compromised Conditions in U937 Cells
Source: PubMed Central journal article supplement (PMC3409216; doi:10.1371/journal.pone.0041945), 2012-07-31
Supplement: pone.0041945.s008.pdf [file pone.0041945.s008.pdf]

## Supporting information Text

### Text S3

In a recent publication STS was shown to induce cell death in cultured rat cortical astrocytes, that can be arrested by 100  $\mu$ M Nec [1]. However in a former publication Cho *et al.* demonstrated that Nec can inhibit necrosis in a RIPK1-independent manner in L929 cell line at around 20-50  $\mu$ M Nec concentration when cell death was induced by TNF $\alpha$  administration. Thus, care should be taken when results obtained with this inhibitor are interpreted [2]. To reflect on this, throughout our experiments we used lower concentration of Nec (namely 10  $\mu$ M).

### References

1. Simenc J, Lipnik-Stangelj M (2012) Staurosporine induces different cell death form in cultures rat astrocytes. *Radiology and Oncology* doi:10.2478/v10019-012-0036-9.
2. Cho Y, McQuade T, Zhang H, Zhang J, Chan FKM (2011) RIP1-dependent and independent effects of necrostatin-1 in necrosis and T cell activation. *PLoS ONE* 6: e23209.
